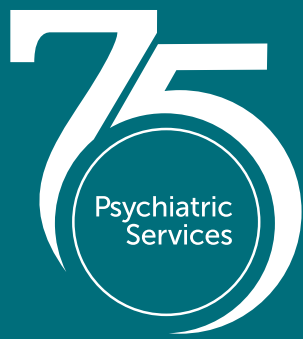

# Psychiatric Services

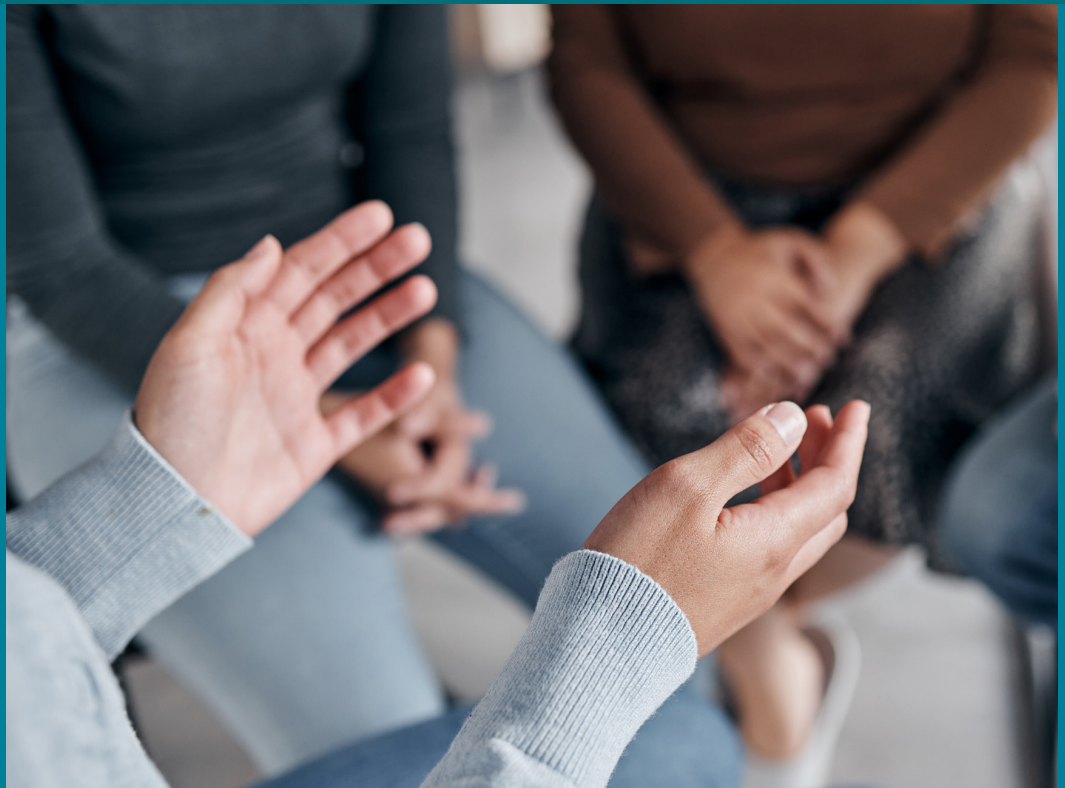

Peer-run respite approaches to supporting people in crisis  
Implementing a recovery coach program across an integrated care system  
Expediting suicide risk assessment with machine learning in crisis calls  
A systematic review of intersectional discrimination in mental health care
